# Supplementary material for: A genomic view of trophic and metabolic diversity in clade-specific Lamellodysidea sponge microbiomes
Source: PubMed Central journal article supplement (PMC7313196; doi:10.1186/s40168-020-00877-y), 2020-06-23
Supplement: 40168_2020_877_MOESM1_ESM.pdf [file 40168_2020_877_MOESM1_ESM.pdf]

# Supplementary Information

## A genomic view of trophic and metabolic diversity in clade-specific *Lamellodysidea* sponge microbiomes

Sheila Podell, Jessica M. Blanton, Aaron Oliver, Michelle A. Schorn, Vinayak Agarwal, Jason S. Biggs, Bradley S. Moore, Eric E. Allen

### Contents

|                                   |    |
|-----------------------------------|----|
| Supplementary Figures S1-S13..... | 2  |
| Supplementary Tables S1-S8.....   | 16 |
| References.....                   | 26 |

**Supplementary Figure 1.** Cyanobacteria MAGs classified taxonomically. A) PhyloPhlAn multi-locus concatenated tree [1], with *Crinalium epipsammum* as an outgroup. B) 16S rRNA gene/and average amino acid identity matrix with closest database relatives. Guidelines for assigning species, genus, family, and order-level taxonomic granularity were based on [2, 3] for AAI and [4] for 16S rRNA gene percent nucleotide identity.

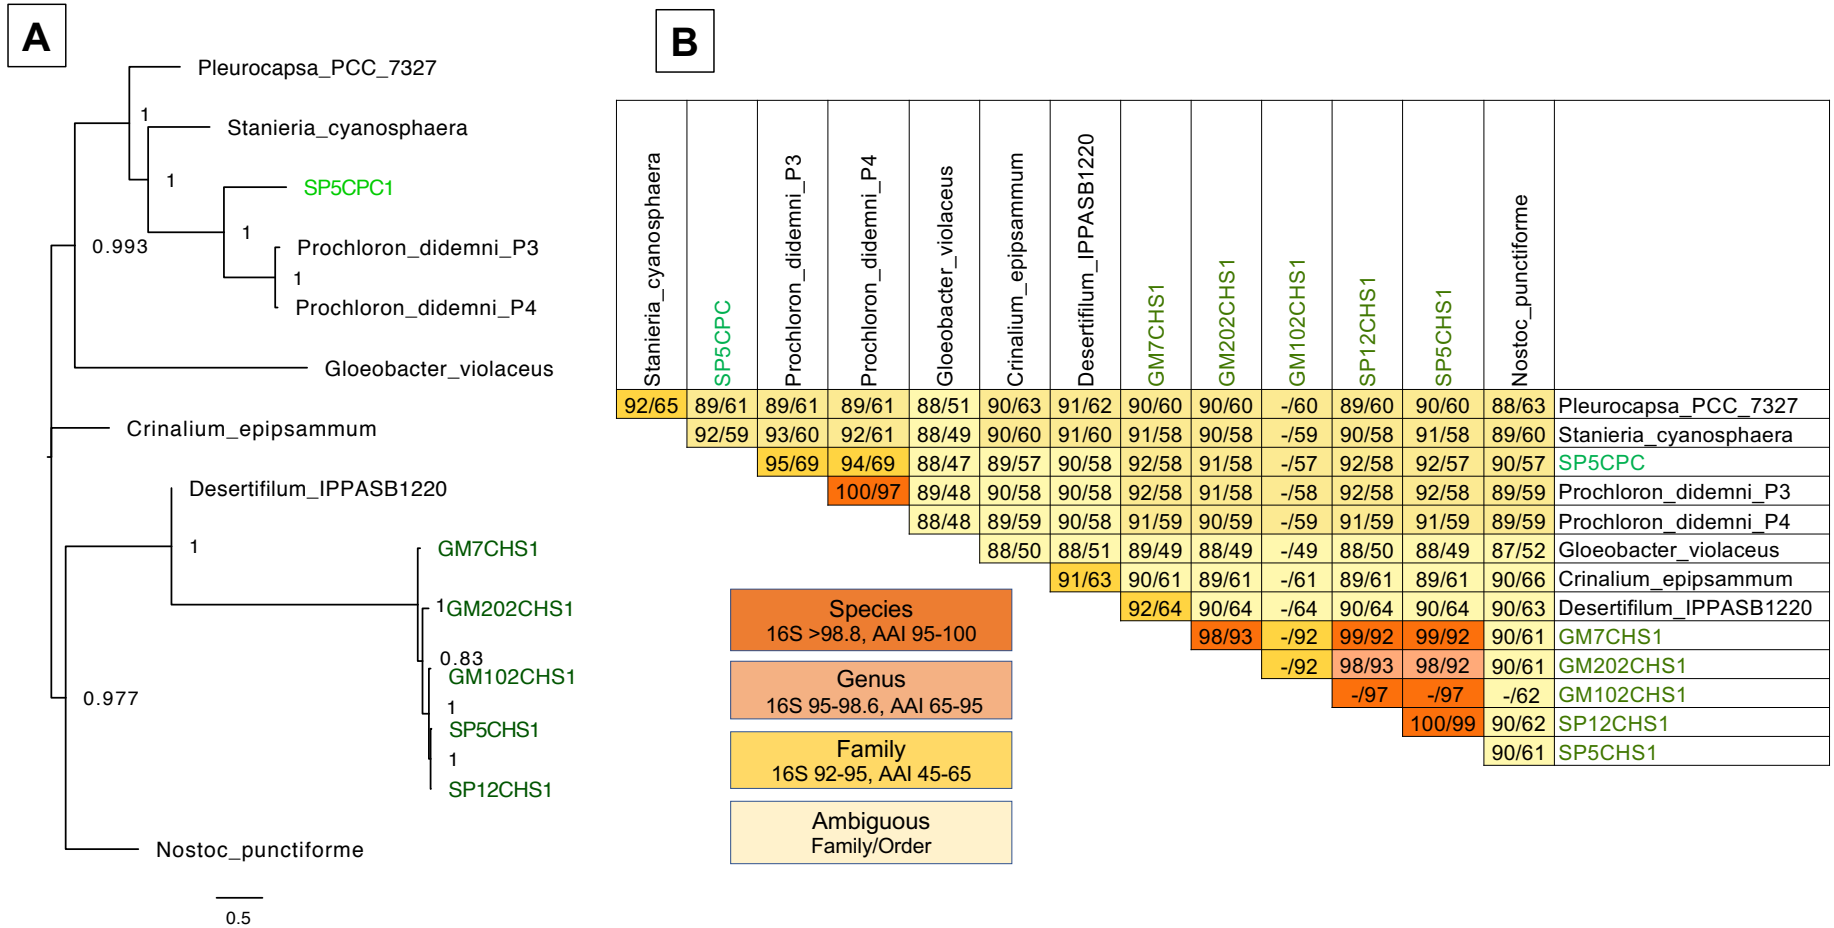

**Supplementary Figure 2.** Bacteroidetes MAGs classified taxonomically. A) PhyloPhlAn multi-locus concatenated tree [1], with SP5OBV1 as an outgroup. B) 16S rRNA gene/and average amino acid identity matrix with closest database relatives.

**A**

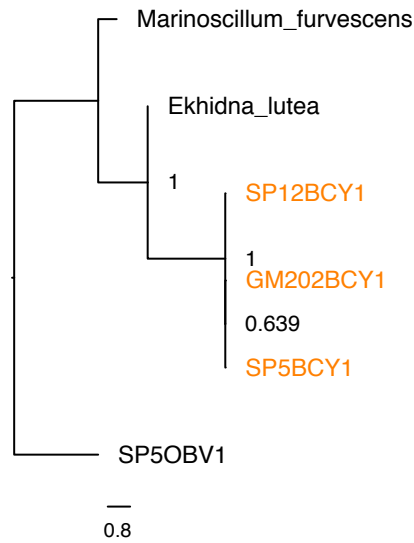

**B**

|                          | GM202BCY1 | SP12BCY1 | SP5BCY1 | Marinoscillum_furvescens |               |
|--------------------------|-----------|----------|---------|--------------------------|---------------|
| GM202BCY1                | 95/67     | 95/67    | 95/67   | 92/57                    | Ekhidna_lutea |
| SP12BCY1                 |           | 100/98   | 100/98  | 91/57                    | GM202BCY1     |
| SP5BCY1                  |           |          | 100/99  | 91/57                    | SP12BCY1      |
| Marinoscillum_furvescens |           |          |         | 91/57                    | SP5BCY1       |

|                                  |
|----------------------------------|
| Species<br>16S >98.8, AAI 95-100 |
| Genus<br>16S 95-98.6, AAI 65-95  |
| Family<br>16S 92-95, AAI 45-65   |
| Ambiguous<br>Family/Order        |





**Supplementary Figure 5.** Oligoflexia MAG classified taxonomically. A) PhyloPhlAn multi-locus concatenated tree [1], with *Oceanobaculum indicum* as an outgroup. B) 16S rRNA gene/and average amino acid identity matrix with closest database relatives.

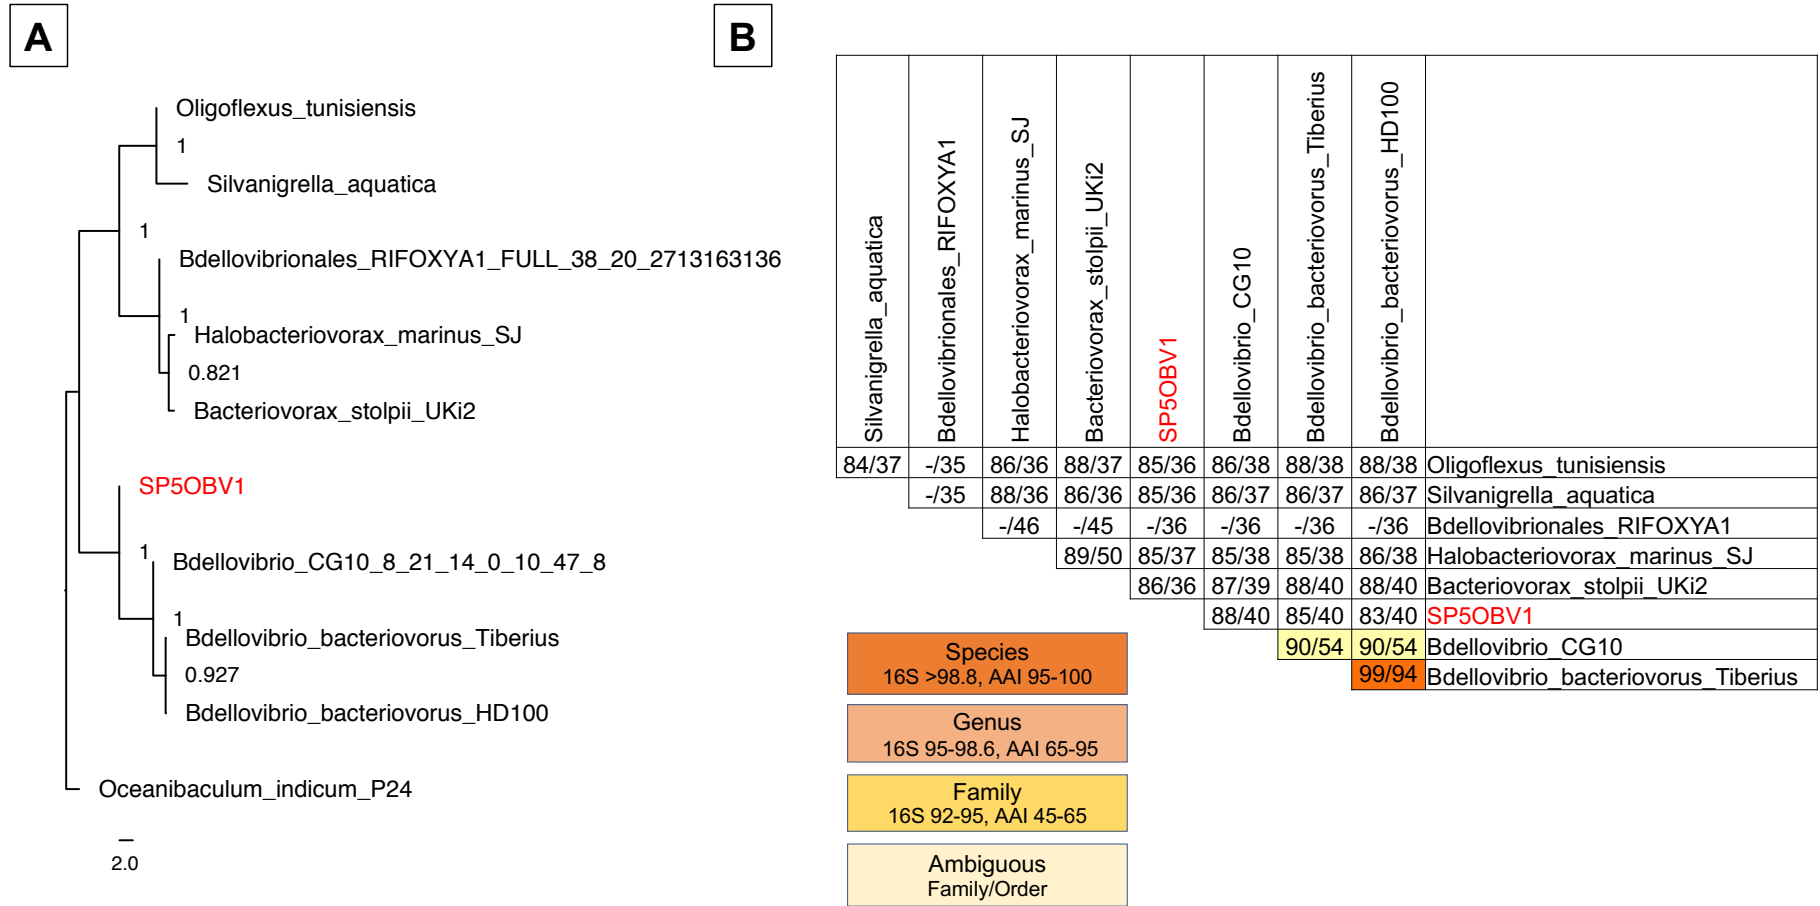

**Supplementary Figure 6.** Relative abundance of metagenomically assembled sequences in 16S rRNA gene amplicon data sets. Amplified 16S rRNA gene sequences were recruited by blastn search at 97% identity to metagenomically assembled 16S rRNA genes and pooled into taxonomic groups as shown in Figure 3. Relative abundances in this chart are normalized to compensate for differences in total number of 16S rRNA reads obtained for each sponge sample (see Supplementary table 2 for total numbers of cleaned, merged amplicon reads). Metagenomically assembled genomes GM102CHS1, GM7ARS4, SP5ARS3, and GM102ARS1 could not be included in this table because they did not contain any sequences overlapping the amplified region of the 16S rRNA gene.

| group        | SP12 | SP5 | SP1 | SP8 | GUM038 | GUM040 | GUM058 | GUM096 | GUM204 |  | GUM020 | GUM102 | GUM203 |  | GUM201 | GUM202 |  | GUM069 | GUM007 |  | seawater |
|--------------|------|-----|-----|-----|--------|--------|--------|--------|--------|--|--------|--------|--------|--|--------|--------|--|--------|--------|--|----------|
| CHS          | 28%  | 46% | 36% | 20% | 38%    | 26%    | 24%    | 36%    | 67%    |  | 47%    | 41%    | 24%    |  | 51%    | 57%    |  | 47%    | 46%    |  | 0.1%     |
| CPC          | 40%  | 5%  | 7%  | 1%  | 7%     | 0%     | 21%    | 10%    | 0%     |  | 0%     | 0%     | 32%    |  | 0%     | 0%     |  | 0%     | 0%     |  | 0.0%     |
| ARB          | 2%   | 4%  | 7%  | 2%  | 7%     | 2%     | 7%     | 4%     | 1%     |  | 2%     | 8%     | 9%     |  | 1%     | 0%     |  | 10%    | 11%    |  | 0.0%     |
| GCR          | 3%   | 1%  | 5%  | 2%  | 3%     | 5%     | 3%     | 4%     | 8%     |  | 22%    | 14%    | 5%     |  | 0%     | 0%     |  | 0%     | 0%     |  | 0.0%     |
| AHP          | 4%   | 9%  | 1%  | 6%  | 9%     | 13%    | 5%     | 8%     | 0%     |  | 0%     | 0%     | 5%     |  | 0%     | 0%     |  | 0%     | 0%     |  | 0.0%     |
| ARS          | 0%   | 0%  | 0%  | 0%  | 0%     | 0%     | 0%     | 0%     | 0%     |  | 0%     | 0%     | 0%     |  | 28%    | 21%    |  | 0%     | 0%     |  | 0.0%     |
| BCY          | 4%   | 1%  | 6%  | 7%  | 2%     | 2%     | 2%     | 3%     | 0%     |  | 0%     | 0%     | 1%     |  | 7%     | 4%     |  | 0%     | 0%     |  | 0.0%     |
| GCV          | 0%   | 0%  | 0%  | 0%  | 0%     | 0%     | 0%     | 0%     | 0%     |  | 0%     | 0%     | 0%     |  | 0%     | 0%     |  | 12%    | 12%    |  | 0.0%     |
| AMS          | 1%   | 1%  | 2%  | 0%  | 1%     | 1%     | 2%     | 1%     | 0%     |  | 0%     | 0%     | 1%     |  | 1%     | 1%     |  | 0%     | 0%     |  | 0.0%     |
| OBV          | 0%   | 0%  | 0%  | 0%  | 0%     | 0%     | 0%     | 0%     | 0%     |  | 1%     | 0%     | 0%     |  | 0%     | 0%     |  | 0%     | 0%     |  | 0.0%     |
|              |      |     |     |     |        |        |        |        |        |  |        |        |        |  |        |        |  |        |        |  |          |
| <b>Total</b> | 82%  | 68% | 62% | 39% | 67%    | 48%    | 62%    | 65%    | 76%    |  | 72%    | 63%    | 76%    |  | 88%    | 82%    |  | 70%    | 69%    |  | 0.1%     |

**Supplementary Figure 7.** Relative abundance of raw metagenomic reads mapping to assembled MAGS. Percentages are based on Bowtie read recruitment at 100% identity. MAGs were pooled into taxonomic groups as shown in Figure 3. A) Relative abundances for all classified reads; B) read recruitment percentages, including unclassified reads. All percentages have normalized for number of reads per sample, but not adjusted for potential differences in genome size.

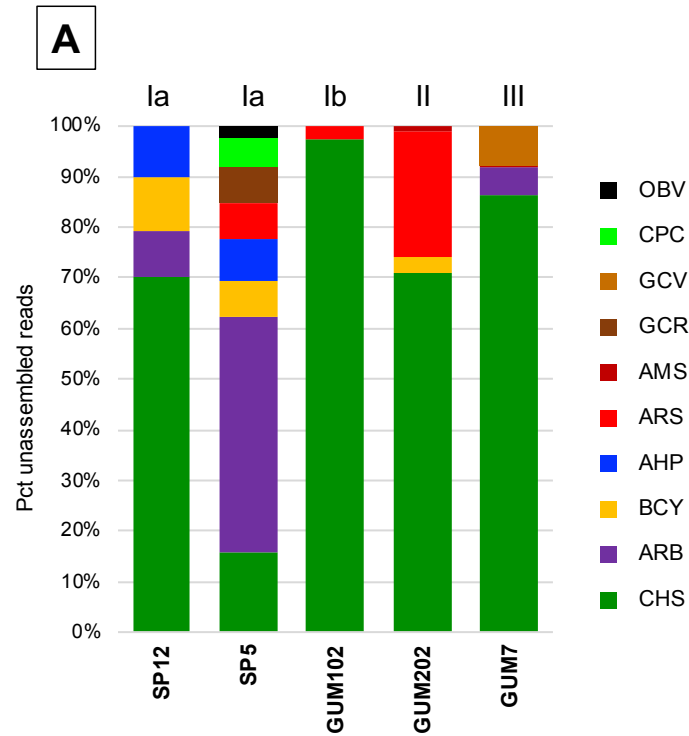

**B**

|       | SP12  | SP5   | GUM102 | GUM202 | GUM7  |
|-------|-------|-------|--------|--------|-------|
| CHS   | 7.1%  | 3.6%  | 6.2%   | 12.9%  | 37.6% |
| ARB   | 0.9%  | 10.8% |        |        | 2.4%  |
| BCY   | 1.1%  | 1.6%  |        | 0.6%   |       |
| AHP   | 1.0%  | 1.9%  |        |        |       |
| ARS   |       | 1.6%  | 0.2%   | 4.5%   |       |
| GCV   |       |       |        |        | 3.4%  |
| GCR   |       | 1.6%  |        |        |       |
| AMS   |       |       |        | 0.2%   | 0.1%  |
| OBV   |       | 0.5%  |        |        |       |
| CPC   |       | 1.4%  |        |        |       |
| other | 89.9% | 76.9% | 93.7%  | 81.8%  | 56.4% |



**Supplementary Figure 8.** Host associations of Type III secretion protein YscR homologs. A) Highlighted YscR homologs from MAGs of this study are shown in the context of a phylogenetic tree annotated with host types as described in [5]. B) Position of YscR homolog in *Yersinia* Type III secretion structure, adapted from [6].

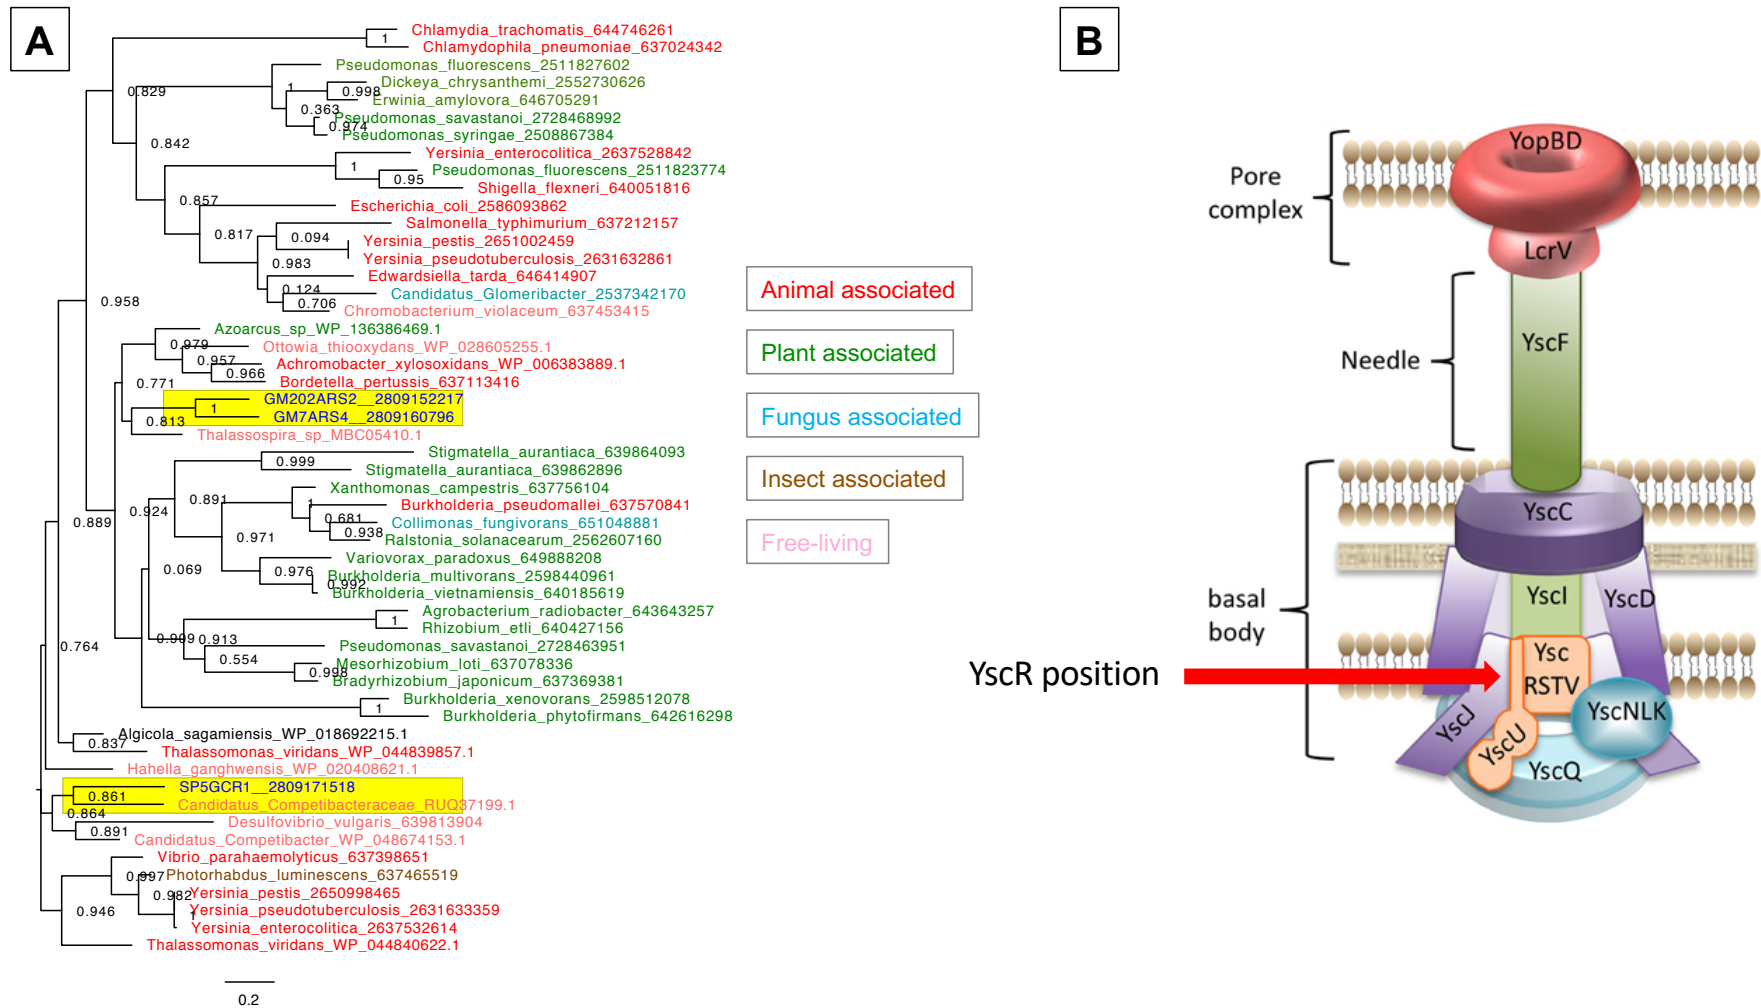

**Supplementary Figure 9.** VirSorter candidate scaffolds in holobiont assemblies. Virus taxonomic groups were obtained by DarkHorse assignment based on blastx matches to a custom database containing all viral sequences in the GenBank nr database as of January 2, 2019.

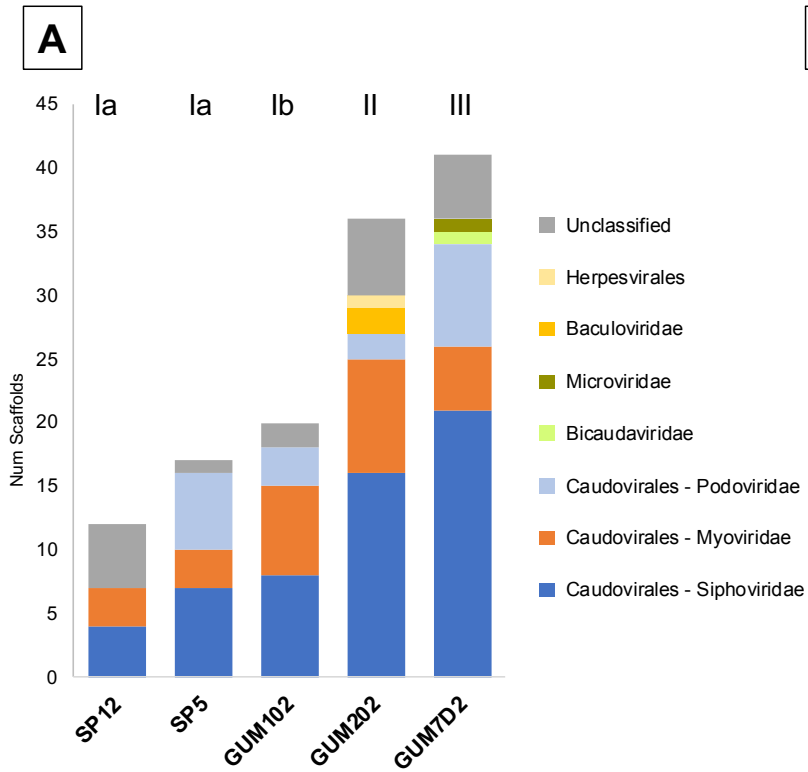

**B**

| sample | Total assembled scf > 3K | Virsorter candidate scf > 3K | Non-prophage candidates | Prophage candidates |
|--------|--------------------------|------------------------------|-------------------------|---------------------|
| SP12   | 9,939                    | 7                            | 7                       | 0                   |
| SP5    | 5,437                    | 17                           | 14                      | 3                   |
| GUM102 | 16,484                   | 20                           | 17                      | 3                   |
| GUM202 | 34,352                   | 36                           | 31                      | 5                   |
| GUM7D2 | 30,973                   | 42                           | 36                      | 6                   |



**Supplementary Figure 11.** Comparison of candidate haloaromatic degradation gene neighborhoods. A) Gene neighborhood maps with halocatechol dioxygenase genes indicated in red. Maps and tables of predicted genes for B) SP12AHP1, C) SP5AHP2 and D) *Altererythrobacter marensis* were obtained using the automated IMG-ER annotation pipeline [7]

**A**

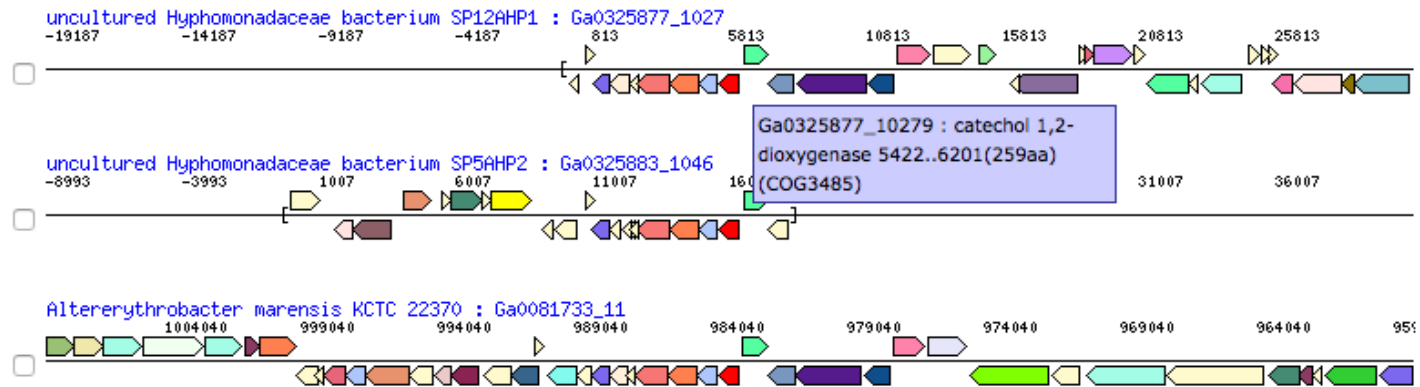

| <b>B</b> | locus tag        | start | end   | str | aa len | product                                                 |
|----------|------------------|-------|-------|-----|--------|---------------------------------------------------------|
|          | Ga0325877_10273  | 827   | 1456  | -   | 210    | 3-oxoacid CoA-transferase subunit B                     |
|          | Ga0325877_10274  | 1456  | 2166  | -   | 237    | 3-oxoacid CoA-transferase subunit A                     |
|          | Ga0325877_10275  | 2163  | 2432  | -   | 90     | hypothetical protein                                    |
|          | Ga0325877_10276  | 2426  | 3637  | -   | 404    | acetyl-CoA acyltransferase                              |
|          | Ga0325877_10277  | 3637  | 4698  | -   | 354    | maleylacetate reductase (EC:1.3.1.32)                   |
|          | Ga0325877_10278  | 4695  | 5396  | -   | 234    | carboxymethylenebutenolidase (EC:3.1.1.45)              |
|          | Ga0325877_10279  | 5422  | 6201  | -   | 260    | chlorocatechol 1,2-dioxygenase (EC:1.13.11)             |
|          | Ga0325877_102710 | 6347  | 7234  | +   | 296    | AraC-like DNA-binding protein                           |
|          | Ga0325877_102711 | 7231  | 8196  | -   | 322    | vanillate O-demethylase ferredoxin subunit (EC:1.14.13) |
|          | Ga0325877_102712 | 8287  | 10815 | -   | 843    | iron complex outermembrane receptor protein             |
|          | Ga0325877_102713 | 10945 | 11847 | -   | 301    | DNA-binding transcriptional LysR family regulator       |
|          | Ga0325877_102714 | 11989 | 13176 | +   | 396    | muconate cycloisomerase (EC:5.5.1.11)                   |
|          | Ga0325877_102715 | 13280 | 14659 | +   | 460    | Rieske-like 2Fe-2S protein                              |
|          | Ga0325877_102716 | 15002 | 15586 | +   | 195    | Cu-Zn family superoxide dismutase                       |

| <b>C</b> | locus tag        | start | end   | str | aa len | product                                     |
|----------|------------------|-------|-------|-----|--------|---------------------------------------------|
|          | Ga0325883_104610 | 9624  | 10412 | -   | 263    | AAA domain-containing protein               |
|          | Ga0325883_104611 | 10750 | 10974 | +   | 75     | hypothetical protein                        |
|          | Ga0325883_104612 | 10988 | 11617 | -   | 210    | 3-oxoacid CoA-transferase subunit B         |
|          | Ga0325883_104613 | 11617 | 12072 | -   | 152    | 3-oxoacid CoA-transferase A subunit         |
|          | Ga0325883_104614 | 12084 | 12245 | -   | 54     | coenzyme A transferase                      |
|          | Ga0325883_104615 | 12084 | 12360 | -   | 92     | hypothetical protein                        |
|          | Ga0325883_104616 | 12084 | 12626 | -   | 181    | hypothetical protein                        |
|          | Ga0325883_104617 | 12084 | 13831 | -   | 582    | acetyl-CoA acyltransferase                  |
|          | Ga0325883_104618 | 12084 | 14892 | -   | 936    | maleylacetate reductase (EC:1.3.1.32)       |
|          | Ga0325883_104619 | 12084 | 15590 | -   | 1169   | carboxymethylenebutenolidase (EC:3.1.1.45)  |
|          | Ga0325883_104620 | 12084 | 16395 | -   | 1437   | chlorocatechol 1,2-dioxygenase (EC:1.13.11) |
|          | Ga0325883_104621 | 12084 | 17428 | +   | 1781   | AraC-like DNA-binding protein               |
|          | Ga0325883_104622 | 12084 | 18144 | -   | 2020   | vanillate O-demethylase ferredoxin subunit  |

|                  |       |       |   |     |                                                   |
|------------------|-------|-------|---|-----|---------------------------------------------------|
| Ga0325883_103332 | 28948 | 29029 | + | 27  | tRNA                                              |
| Ga0325883_103333 | 29544 | 30128 | - | 195 | Cu-Zn family superoxide dismutase                 |
| Ga0325883_103334 | 30471 | 31850 | - | 460 | Rieske-like 2Fe-2S protein                        |
| Ga0325883_103335 | 31954 | 33141 | - | 396 | muconate cycloisomerase                           |
| Ga0325883_103336 | 33283 | 34185 | + | 301 | DNA-binding transcriptional LysR family regulator |
| Ga0325883_103337 | 34315 | 36207 | + | 631 | iron complex outermembrane receptor protein       |

| <b>D</b> | locus tag       | start  | end    | str | aa len | product                                           |
|----------|-----------------|--------|--------|-----|--------|---------------------------------------------------|
|          | Ga0081733_11974 | 990774 | 990863 | -   | -      | tRNA                                              |
|          | Ga0081733_11973 | 989592 | 990704 | +   | 371    | ribonuclease Z                                    |
|          | Ga0081733_11972 | 989065 | 989595 | +   | 177    | AhpC/TSA family protein                           |
|          | Ga0081733_11971 | 988430 | 989065 | +   | 212    | 3-oxoadipate CoA-transferase, beta subunit        |
|          | Ga0081733_11970 | 987729 | 988433 | +   | 235    | 3-oxoacid CoA-transferase, alpha subunit          |
|          | Ga0081733_11969 | 987475 | 987732 | +   | 86     | hypothetical protein                              |
|          | Ga0081733_11968 | 986258 | 987475 | +   | 406    | acetyl-CoA C-acetyltransferase                    |
|          | Ga0081733_11967 | 985194 | 986261 | +   | 356    | Alcohol dehydrogenase, class IV                   |
|          | Ga0081733_11966 | 984499 | 985197 | +   | 233    | carboxymethylenebutenolidase                      |
|          | Ga0081733_11965 | 983647 | 984429 | +   | 261    | chlorocatechol 1,2-dioxygenase                    |
|          | Ga0081733_11964 | 982628 | 983536 | -   | 303    | AraC-type DNA-binding protein                     |
|          | Ga0081733_11963 | 981635 | 982597 | +   | 321    | vanillate O-demethylase ferredoxin subunit        |
|          | Ga0081733_11962 | 979176 | 981575 | +   | 800    | iron complex outermembrane receptor protein       |
|          | Ga0081733_11961 | 978159 | 979067 | +   | 303    | DNA-binding transcriptional LysR family regulator |
|          | Ga0081733_11960 | 976848 | 978008 | -   | 387    | muconate cycloisomerase                           |
|          | Ga0081733_11959 | 975362 | 976741 | -   | 460    | Phenylpropionate dioxygenase                      |
|          | Ga0081733_11958 | 972321 | 975227 | +   | 969    | outer membrane autotransporter                    |
|          | Ga0081733_11957 | 971208 | 972179 | +   | 324    | Helix-turn-helix domain-containing protein        |
|          | Ga0081733_11956 | 968082 | 970967 | +   | 962    | zinc protease                                     |
|          | Ga0081733_11955 | 964450 | 967980 | +   | 1177   | TonB-dependent receptor                           |
|          | Ga0081733_11954 | 963170 | 964294 | +   | 375    | transmembrane sensor                              |
|          | Ga0081733_11953 | 962644 | 963183 | +   | 180    | RNA polymerase sigma-70 factor                    |
|          | Ga0081733_11952 | 962311 | 962469 | +   | 53     | hypothetical protein                              |
|          | Ga0081733_11951 | 960329 | 962191 | +   | 621    | monovalent cation:H <sup>+</sup> antiporter       |
|          | Ga0081733_11950 | 958779 | 960191 | +   | 471    | dihydroliipoamide dehydrogenase                   |
|          | Ga0081733_11949 | 958294 | 958683 | +   | 130    | acyl-CoA thioesterase YciA                        |
|          | Ga0081733_11948 | 957889 | 958290 | +   | 134    | hypothetical protein                              |
|          | Ga0081733_11947 | 956595 | 957887 | +   | 431    | pyruvate dehydrogenase                            |

**Supplementary Figure 12.** Phylogenetic tree of halocatechol 1,2 dioxygenases. Tree shows SP12AHP1 and SP5AHP1 halocatechol 1,2-dioxygenases, highlighted in red, compared to closest GenBank nr database protein relatives. Chemically characterized chlorocatechol 1,2-dioxygenases are highlighted in blue.

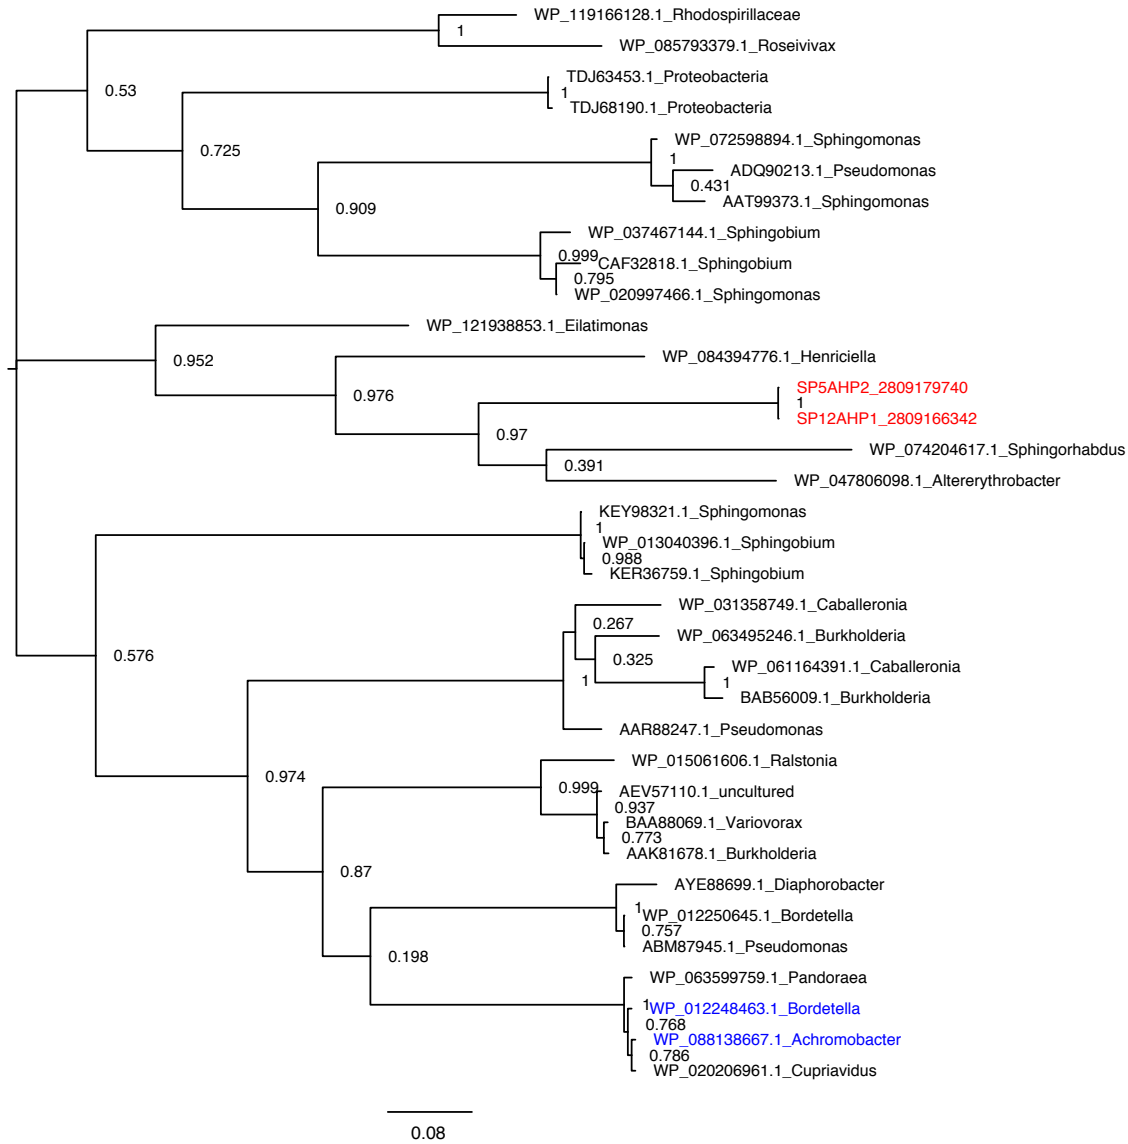

**Supplementary Figure 13.** MySQL schema for extracting sample metadata and abundance statistics from the Sponge Microbiome Database. Tables were populated using data in Supplementary tables 3,4, and 5 from [10].

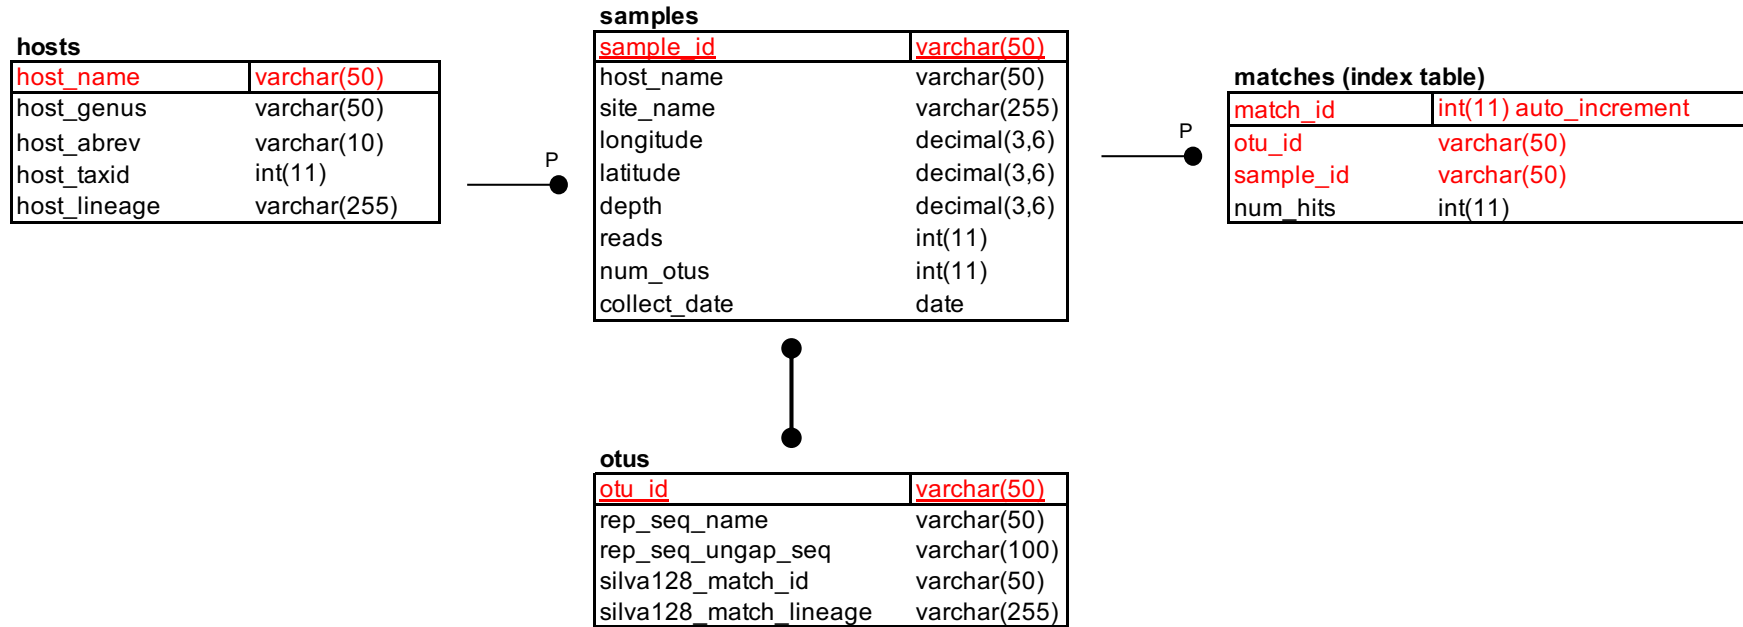

**Supplementary Table 1.** *Lamellodysidea* sponge sampling metadata.

| Host clade (ITS) | Sample name | Location        | Collect date | Description                           | NCBI Biosample ID | 16S amplicon merged seqs | Illumina metagenomic reads | PacBio metagenomic reads |
|------------------|-------------|-----------------|--------------|---------------------------------------|-------------------|--------------------------|----------------------------|--------------------------|
| Ia               | SP12        | Anae Island     | June 2014    | lime green, purple patches, flat      | SAMN04939363      | 227,847                  | 45,810,804                 | -                        |
| Ia               | SP5         | Piti Bomb Holes | June 2014    | lime green, purple base, lettuce leaf | SAMN04939377      | 126,418                  | 46,496,996                 | -                        |
| Ia               | SP1         | Piti Bomb Holes | June 2014    | lime green, purple base, lettuce leaf | SAMN04939374      | 97,761                   | -                          | -                        |
| Ia               | SP8         | Piti Bomb Holes | June 2014    | lime green, purple base, lettuce leaf | SAMN04939378      | 112,399                  | -                          | -                        |
| Ia               | GUM038      | Anae Island     | July 2015    | white/gray, flat                      | SAMN04939360      | 114,867                  | -                          | -                        |
| Ia               | GUM040      | Anae Island     | July 2015    | white/gray, flat                      | SAMN04939361      | 213,095                  | -                          | -                        |
| Ia               | GUM058      | Piti Bomb Holes | July 2015    | lime green, lettuce leaf              | SAMN04939368      | 84,608                   | -                          | -                        |
| Ia               | GUM096      | Piti Bomb Holes | July 2015    | lime green, lettuce leaf              | SAMN04939369      | 114,282                  | -                          | -                        |
| Ia               | GUM203      | Piti Bomb Holes | Dec. 2016    | lime green, purple base, lettuce leaf | SAMN12982864      | 3,280                    | -                          | -                        |
| Ib               | GUM020      | Piti Bomb Holes | July 2015    | green with white ridged fingers       | SAMN04939367      | 123,293                  | -                          | -                        |
| Ib               | GUM102      | Piti Bomb Holes | July 2015    | green with white ridged fingers       | SAMN04939373      | 195,184                  | 148,726,466                | -                        |
| Ib               | GUM204      | Tumon Bay       | Dec. 2016    | green with white ridged fingers       | SAMN12982865      | 6,503                    | -                          | -                        |
| II               | GUM201      | Anae Island     | Dec. 2016    | green flat with delicate fingers      | SAMN12982858      | 5,096                    | -                          | -                        |
| II               | GUM202      | Anae Island     | Dec. 2016    | white/gray flat with delicate fingers | SAMN10266269      | 4,237                    | 100,368,352                | 31,034                   |
| III              | GUM069      | Pago Bay        | July 2015    | dark green ridged, fleshy fingers     | SAMN04939366      | 128,996                  | -                          | -                        |
| III              | GUM7D2      | Pago Bay        | July 2015    | dark green ridged, fleshy fingers     | SAMN04939364      | 79,191                   | 178,947,320                | -                        |
| III              | GUM007      | Pago Bay        | July 2015    | trichome enrichment of sample GUM7D2  | SAMN04939365      | -                        | 82,554,626                 | 180,838                  |
| na               | GUM61       | Anae Island     | July 2015    | seawater                              | SAMN12983225      | 1,405,063                | -                          | -                        |



**Supplementary Table 2.** Sponge holobiont and trichome metagenomic assembly statistics.

| <b>Sample name</b> | <b>Sample type</b>  | <b>pct reads assembled</b> | <b>Read type</b> | <b>Avg read length</b> | <b>Assembled reads</b> | <b>scf &gt;3K</b> | <b>Max scf len</b> |
|--------------------|---------------------|----------------------------|------------------|------------------------|------------------------|-------------------|--------------------|
| SP12               | holobiont tissue    | 32%                        | Illumina         | 90                     | 14,534,232             | 9,939             | 75,936             |
| SP5                | holobiont tissue    | 37%                        | Illumina         | 90                     | 17,349,474             | 5,437             | 235,084            |
| GUM102             | holobiont tissue    | 46%                        | Illumina         | 135                    | 68,102,612             | 16,294            | 75,068             |
| GUM202             | holobiont tissue    | 75%                        | Illumina         | 150                    | 75,290,051             | 34,352            | 442,614            |
| GUM7D2             | holobiont tissue    | 33%                        | Illumina         | 150                    | 27,376,842             | 30,974            | 325,242            |
| GUM202             | trichome enrichment | nd                         | PacBio           | 3852                   | 31,034                 | 67*               | 304,029*           |
| GUM007             | trichome enrichment | 40%                        | PacBio           | 4445                   | 71,965                 | 6                 | 3,147,220          |

\*GUM202 trichome enrichment reads were assembled in combination with Illumina GUM202 holobiont sequences, as previously described in [11].

**Supplementary Table 3.** MIMAG parameters for assembled genomes.

| Host clade | Assembly Name | Organism name                        | analysis project type | assemb. software    | Multi-marker taxonomy                                                            | MIMAG qual | Completeness score | Contamination score | Completeness software |
|------------|---------------|--------------------------------------|-----------------------|---------------------|----------------------------------------------------------------------------------|------------|--------------------|---------------------|-----------------------|
| Ia         | SP12AHP1      | Hyphomonadaceae bacterium SP12AHP1   | MAG                   | idba-ud v. 1.1.1    | Alphaproteobacteria;Rhodobacterales; Hyphomonadaceae                             | high       | 91.4               | 0.0                 | Check M               |
| Ia         | SP12ARB1      | Rhodobacteraceae bacterium SP12ARB1  | MAG                   | idba-ud v. 1.1.1    | Alphaproteobacteria;Rhodobacterales; Rhodobacteraceae                            | med        | 69.1               | 0.0                 | Check M               |
| Ia         | SP12BCY1      | Ekhidna sp. SP12BCY1                 | MAG                   | idba-ud v. 1.1.1    | Bacteroidetes;Cytophagia;Cytophagales; Cytophagaceae;Ekhidna                     | high       | 100.0              | 0.0                 | Check M               |
| Ia         | SP12CHS1      | Hormopscilla sp. SP12CHS1            | MAG                   | idba-ud v. 1.1.1    | Cyanobacteria;Oscillatoriophycideae; Oscillatoriales;Gomontiellaceae;Hormoscilla | high       | 96.6               | 0.2                 | Check M               |
|            |               |                                      |                       |                     |                                                                                  |            |                    |                     |                       |
| Ia         | SP5AHP2       | Hyphomonadaceae bacterium SP5AHP1    | MAG                   | Celera Assem. v.8.3 | Alphaproteobacteria;Rhodobacterales; Hyphomonadaceae                             | med        | 87.8               | 0.0                 | Check M               |
| Ia         | SP5ARB1       | Rhodobacteraceae bacterium SP5ARB1   | MAG                   | idba-ud v. 1.1.1    | Alphaproteobacteria;Rhodobacterales; Rhodobacteraceae                            | med        | 82.4               | 3.4                 | Check M               |
| Ia         | SP5ARS3       | Rhodospirillales bacterium SP5ARS3   | MAG                   | idba-ud v. 1.1.1    | Alphaproteobacteria:Rhodospirillales                                             | med        | 94.8               | 0.0                 | Check M               |
| Ia         | SP5BCY1       | Ekhidna sp. SP5BCY1                  | MAG                   | idba-ud v. 1.1.1    | Bacteroidetes;Cytophagia;Cytophagales; Cytophagaceae;Ekhidna                     | high       | 96.4               | 0.5                 | Check M               |
| Ia         | SP5CHS1       | Hormopscilla sp. SP5CHS1             | MAG                   | idba-ud v. 1.1.1    | Cyanobacteria;Oscillatoriophycideae; Oscillatoriales;Gomontiellaceae;Hormoscilla | high       | 96.6               | 0.2                 | Check M               |
| Ia         | SP5CPC1       | Pochloron sp SP5CPC1                 | MAG                   | idba-ud v. 1.1.1    | Cyanobacteria;Synechococcales;Prochloraceae; Prochloron                          | med        | 77.4               | 0.0                 | Check M               |
| Ia         | SP5GCR1       | Chromatiales bacterium SP5GCR1       | MAG                   | idba-ud v. 1.1.1    | Gammaproteobacteria;Chromatiales                                                 | high       | 98.3               | 0.0                 | Check M               |
| Ia         | SP5OBV1       | Bdellovibrionales bacterium SP5)BV1  | MAG                   | idba-ud v. 1.1.1    | Oligoflexia;Bdellovibrionales                                                    | high       | 91.2               | 0.0                 | Check M               |
|            |               |                                      |                       |                     |                                                                                  |            |                    |                     |                       |
| Ib         | GM102ARS1     | Rhodospirillales bacterium GM102ARS1 | MAG                   | idba-ud v. 1.1.1    | Alphaproteobacteria:Rhodospirillales                                             | low        | 41.2               | 0.8                 | Check M               |
| Ib         | GM102HS1      | Hormopscilla sp. GM102CHS1           | MAG                   | idba-ud v. 1.1.1    | Cyanobacteria;Oscillatoriophycideae; Oscillatoriales;Gomontiellaceae;Hormoscilla | med        | 95.7               | 1.8                 | Check M               |
|            |               |                                      |                       |                     |                                                                                  |            |                    |                     |                       |
| II         | GM202ARS1     | Rhodospirillales bacterium GM202ARS1 | MAG                   | Celera Assem.       | Alphaproteobacteria:Rhodospirillales                                             | high       | 100.0              | 0.0                 | Check M               |

| Host clade | Assembly Name | Organism name                                    | analysis project type | assemb. software    | Multi-marker taxonomy                                                            | MIMAG qual | Completeness score | Contamination score | Completeness software |
|------------|---------------|--------------------------------------------------|-----------------------|---------------------|----------------------------------------------------------------------------------|------------|--------------------|---------------------|-----------------------|
|            |               |                                                  |                       | v.8.3               |                                                                                  |            |                    |                     |                       |
| II         | GM202ARS2     | Candidatus Methylospingiales bacterium GM202ARS2 | MAG                   | idba-ud v. 1.1.1    | Alphaproteobacteria:Candidatus Methylospingiales                                 | med        | 85.3               | 0.8                 | Check M               |
| II         | GM202BCY1     | Ekhidna sp. GM202BCY1                            | MAG                   | Celera Assem. v.8.3 | Bacteroidetes;Cytophagia;Cytophagales; Cytophagaceae;Ekhidna                     | high       | 94.9               | 0.5                 | Check M               |
| II         | GM202CHS1     | Hormoscilla sp. GM202CHS1                        | MAG                   | SPAdes v. 3.10.1    | Cyanobacteria;Oscillatoriophycideae; Oscillatoriales;Gomontiellaceae;Hormoscilla | high       | 97.4               | 2.0                 | Check M               |
|            |               |                                                  |                       |                     |                                                                                  |            |                    |                     |                       |
| III        | GM7ARB1       | Rhodobacteraceae bacterium GM7ARB1               | MAG                   | Celera Assem. v.8.3 | Alphaproteobacteria;Rhodobacterales; Rhodobacteraceae                            | high       | 96.6               | 0.0                 | Check M               |
| III        | GM7ARB2       | Rhodobacteraceae bacterium GM7ARB2               | MAG                   | Celera Assem. v.8.3 | Alphaproteobacteria;Rhodobacterales; Rhodobacteraceae                            | high       | 93.7               | 0.9                 | Check M               |
| III        | GM7ARS4       | Candidatus Methylospingiales bacterium GM7ARS2   | MAG                   | idba-ud v. 1.1.1    | Alphaproteobacteria:Candidatus Methylospingiales                                 | med        | 91.0               | 0.8                 | Check M               |
| III        | GM7CHS1pb     | Hormoscilla sp. GM7CHS1                          | MAG                   | CANU v. 1.8         | Cyanobacteria;Oscillatoriophycideae; Oscillatoriales;Gomontiellaceae;Hormoscilla | high       | 100.0              | 1.8                 | Check M               |
| III        | GM7GCV1       | Cellvibrionales bacterium GM7GCV1                | MAG                   | Celera Assem. v.8.3 | Gammaproteobacteria;Cellvibrionales                                              | med        | 89.1               | 0.0                 | Check M               |

**Supplementary Table 4.** Closest environmental matches from the GenBank nr database to 16S rRNA genes obtained from MAGs. GM102CHS1, GM7ARS4, SP5ARS3, GM102ARS1 are not included in this table because they did not include any 16S rRNA genes of 300 nt or longer.

| Tax group | MAG       | Environ 16S tophit | Env. 16S pct ident | Aln len | Environ tophit habitat            | Ref.         | Lineage                                                                         |
|-----------|-----------|--------------------|--------------------|---------|-----------------------------------|--------------|---------------------------------------------------------------------------------|
| CHS       | GM202CHS1 | AY615507.1         | 99%                | 1410    | Sponge - Lamellodysidea           | [12]         | Cyanobacteria;Oscillatoriophycideae;Oscillatoriales;Gomontiellaceae;Hormoscilla |
| CHS       | GM7CHS1   | AY615501.1         | 100%               | 1410    | Sponge - Lamellodysidea           | [12]         | Cyanobacteria;Oscillatoriophycideae;Oscillatoriales;Gomontiellaceae;Hormoscilla |
| CHS       | SP12CHS1  | AY615505.1         | 99%                | 1410    | Sponge - Lamellodysidea           | [12]         | Cyanobacteria;Oscillatoriophycideae;Oscillatoriales;Gomontiellaceae;Hormoscilla |
| CHS       | SP5CHS1   | AY615505.1         | 100%               | 1410    | Sponge - Lamellodysidea           | [12]         | Cyanobacteria;Oscillatoriophycideae;Oscillatoriales;Gomontiellaceae;Hormoscilla |
| CPC       | SP5CPC1   | DQ357958.1         | 99%                | 1443    | Tunicates - Lissoclinum           | [13]         | Cyanobacteria;Synechococcales;Prochloraceae;Prochloron                          |
| AMS       | GM202ARS2 | AY845234.1         | 99%                | 1425    | Sponge - Lamellodysidea           | [12]         | Alphaproteobacteria:Candidatus Methylospingiales                                |
| AMS       | GM202ARS1 | AY845233.1         | 100%               | 1468    | Sponge - Lamellodysidea           | [12]         | Alphaproteobacteria:Rhodospirillales                                            |
| ARB       | SP5ARB1   | AY845235.1         | 99%                | 1384    | Sponge - Lamellodysidea           | [12]         | Alphaproteobacteria;Rhodobacterales;Rhodobacteraceae                            |
| ARB       | SP12ARB2  | AY845235.1         | 98%                | 1379    | Sponge - Lamellodysidea           | [12]         | Alphaproteobacteria;Rhodobacterales;Rhodobacteraceae                            |
| ARB       | GM7ARB1   | KM051808.1         | 97%                | 1448    | Basaltic Crust Borehole biofilm   | Un-published | Alphaproteobacteria;Rhodobacterales;Rhodobacteraceae                            |
| ARB       | GM7ARB2   | CP016093.1         | 88%                | 1474    | Biocathode biofilm                | Un-published | Alphaproteobacteria;Rhodobacterales;Rhodobacteraceae                            |
| AHP       | SP12AHP1  | JF769570.1         | 96%                | 1467    | seawater near algae (sea lettuce) | Un-published | Alphaproteobacteria;Rhodobacterales;Hyphomonadaceae                             |
| AHP       | SP5AHP2   | JF769570.1         | 96%                | 1467    | seawater near algae (sea lettuce) | Un-published | Alphaproteobacteria;Rhodobacterales;Hyphomonadaceae                             |
| BCY       | GM202BCY1 | AM259890.1         | 96%                | 1460    | sponge - Tethya                   | [14]         | Bacteroidetes;Cytophagia;Cytophagales;Cytophagaceae                             |
| BCY       | SP5BCY1   | AM259890.1         | 96%                | 1460    | sponge - Tethya                   | [14]         | Bacteroidetes;Cytophagia;Cytophagales;Cytophagaceae                             |
| BCY       | SP12BCY1  | AM259890.1         | 96%                | 1460    | sponge - Tethya                   | [14]         | Bacteroidetes;Cytophagia;Cytophagales;Cytophagaceae                             |
| GCR       | SP5GCR1   | JX391667.1         | 91%                | 1514    | PBDE contam marine sediment       | Un-published | Gammaproteobacteria;Chromatiales                                                |
| GCV       | GM7GCV1   | JQ062844.1         | 90%                | 1500    | sponge- Stylissa                  | [15]         | Gammaproteobacteria;Cellvibrionales;Cellvibrionaceae                            |
| OVB       | SP5OBV1   | EF092260           | 96%                | 1442    | sponge - Axinella                 | Un-published | Oligoflexia;Bdellovibrionales                                                   |

**Supplementary Table 5.** Assembled MAG 16S rRNA gene matches to Sponge Microbiome Database samples at 97% nucleotide identity. Database sequences were 99 bp segments amplified from the V4 region of the 16S rRNA gene [10]. Sponge Microbiome Database samples with the maximum number of matches to each MAG-associated 16S rRNA gene from this study were selected to determine the number and percent of matched sequences, and reported here along with host genus and geographical collection site. GM102CHS1, GM7ARS4, SP5ARS3, GM102ARS1 are not included in this table because they did not include any sequences overlapping the V4 region of the 16S rRNA gene.

| Tax group | MAGs                                  | 16S len | All host genera                                                                                          | Host with max pct          | total OTU in sample | max num OTU matches | max pct OTU matches | site name                    | sample_id                |
|-----------|---------------------------------------|---------|----------------------------------------------------------------------------------------------------------|----------------------------|---------------------|---------------------|---------------------|------------------------------|--------------------------|
| CHS       | SP12CHS1, SP5CHS1, GM202CHS1, GM7CHS1 | 1486    | Xestospongia, Cliona                                                                                     | Xestospongia bocatorensis  | 647                 | 57                  | 16.7%               | Panama                       | P10X53.1020516           |
| BCY       | GUM202BCY1, SP5BCY1, SP12BCY1         | 1524    | Carteriospongia, Cymbastela, Dysidea, Ectyoplasia, Mycale, marine sediment                               | Cymbastela coralliophila   | 304                 | 4                   | 1.3%                | Davies Reef                  | Webster.1.E1.49.1019860  |
| ARB       | GM7ARB2                               | 1243    | Dysidea                                                                                                  | Dysidea avara              | 336                 | 15                  | 4.5%                | Limski Canal                 | GC.4.2.1019709           |
| ARB       | GM7ARB1                               | 1470    | Chondrilla, Cinachyrella, Cliona, Dysidea, Ectyoplasia, Lissodendoryx, Mycale, seawater, marine sediment | Lissodendoryx colombiensis | 237                 | 1                   | 0.4%                | Panama                       | P12x59.1019532           |
| ARB       | SP5ARB1, SP12ARB1                     | 1497    | Dysidea, Xestospongia                                                                                    | Xestospongia bocatorensis  | 678                 | 1                   | 0.1%                | Panama                       | SI06.11.1019752          |
| ARS       | GM202ARS2                             | 1504    | Dysidea                                                                                                  | Dysidea avara              | 336                 | 2                   | 0.6%                | Limski Canal                 | GC.4.2.1019709           |
| ARS       | GUM202ARS1                            | 1507    | Cymbastela, Xestospongia                                                                                 | Cymbastela coralliophila   | 1341                | 3                   | 0.2%                | Davies Reef                  | SS.9.2.1019758           |
| AHP       | SP12AHP1, SP5AHP2                     | 1479    | Ircinia                                                                                                  | Ircinia strobilina         | 2940                | 1                   | 0.04%               | Banco Chinchorros            | 17.1020038               |
| DBV       | SP5DBV1                               | 1517    | Cymbastela, Ircinia, Mycale                                                                              | Cymbastela                 | 1085                | 3                   | 0.3%                | Sponge Farm                  | ZA.44.1020227            |
| GCR       | SP5GCR1                               | 1548    | Carteriospongia, Cymbastela, Cliona, Xestospongia                                                        | Carteriospongia foliascens | 953                 | 4                   | 0.4%                | Kimberley, Western Australia | Webster.3.H4.276.1019944 |

| <b>Tax group</b> | <b>MAGs</b> | <b>16S len</b> | <b>All host genera</b>     | <b>Host with max pct</b> | <b>total OTU in sample</b> | <b>max num OTU matches</b> | <b>max pct OTU matches</b> | <b>site name</b> | <b>sample id</b> |
|------------------|-------------|----------------|----------------------------|--------------------------|----------------------------|----------------------------|----------------------------|------------------|------------------|
| GCV              | GM7GCV1     | 1517           | no matches above threshold | nd                       | nd                         | nd                         | nd                         | nd               | nd               |
| CPC              | SP5CPC1     | 1442           | no matches above threshold | nd                       | nd                         | nd                         | nd                         | nd               | nd               |

**Supplementary Table 6.** Tally of membrane-associated gene products in MAGs. Values for adhesive genes, signal sequences, and transporter types were tallied based on keyword searches of MAG annotations at IMG-MER [7].

| tax group | Genome name | num CDS | num transporters | pct CDS as transporter | chemo-taxis proteins (Che/Mot) | motility type | cadherin domain proteins | ankyrin domain proteins | Type IV pili genes | num signal peptide genes | pct signal peptide genes | signal proteases | signal glycosidases |
|-----------|-------------|---------|------------------|------------------------|--------------------------------|---------------|--------------------------|-------------------------|--------------------|--------------------------|--------------------------|------------------|---------------------|
| CHS       | SP12CHS1    | 5961    | 195              | 3.3%                   | 6                              | twitching     |                          | 2                       | 12                 | 74                       | 1.2                      | 5                | 0                   |
| CHS       | SP5CHS1     | 5738    | 176              | 3.1%                   | 4                              | twitching     |                          | 2                       | 11                 | 80                       | 1.4                      | 7                | 0                   |
| CHS       | GM102CHS1   | 6390    | 172              | 2.7%                   | 2                              | twitching     | 1                        | 2                       | 16                 | 78                       | 1.2                      | 6                | 0                   |
| CHS       | GM7CHS1     | 7441    | 196              | 2.6%                   | 5                              | twitching     | 2                        | 3                       | 13                 | 111                      | 1.4                      | 6                | 1                   |
| CHS       | GM202CHS1   | 6160    | 247              | 4.0%                   | 6                              | twitching     |                          | 5                       | 15                 | 113                      | 1.5                      | 7                | 0                   |
| CPC       | SP5CPC1     | 3413    | 122              | 3.6%                   | 24                             | twitching     |                          | 5                       | 8                  | 83                       | 2.4                      | 4                | 1                   |
| AMS       | GM7ARS4     | 1377    | 76               | 5.5%                   | 0                              | none          |                          | 3                       | 8                  | 57                       | 4.0                      | 4                | 0                   |
| AMS       | GM202ARS2   | 1836    | 91               | 5.0%                   | 0                              | none          |                          | 18                      | 11                 | 88                       | 4.7                      | 6                | 0                   |
| ARS       | GM202ARS1   | 2858    | 251              | 8.8%                   | 1                              | none          |                          | 14                      | 2                  | 136                      | 4.7                      | 5                | 2                   |
| ARS       | SP5ARS3     | 2570    | 312              | 12.1%                  | 0                              | none          |                          | 22                      |                    | 146                      | 5.6                      | 2                | 2                   |
| ARS       | GM102ARS1   | 1161    | 102              | 8.8%                   | 1                              | none          |                          | 8                       |                    | 47                       | 4.0                      | 2                | 1                   |
| ARB       | GM7ARB1     | 2449    | 247              | 10.1%                  | 2                              | none          |                          | 14                      |                    | 124                      | 5.0                      | 4                | 0                   |
| ARB       | GM7ARB2     | 2505    | 234              | 9.3%                   | 1                              | none          |                          | 8                       | 1                  | 129                      | 5.1                      | 5                | 3                   |
| ARB       | SP12ARB1    | 3273    | 263              | 8.0%                   | 1                              | none          | 1                        | 6                       | 2                  | 121                      | 3.7                      | 5                | 1                   |
| ARB       | SP5ARB1     | 2628    | 237              | 9.0%                   | 1                              | none          |                          | 6                       | 2                  | 130                      | 4.9                      | 1                | 1                   |
| AHP       | SP12AHP1    | 2275    | 113              | 5.0%                   | 0                              | none          |                          | 30                      |                    | 152                      | 6.5                      | 7                | 7                   |
| AHP       | SP5AHP2     | 2292    | 107              | 4.7%                   | 0                              | none          |                          | 32                      |                    | 135                      | 5.8                      | 6                | 6                   |
| BCY       | SP12BCY1    | 2828    | 128              | 4.5%                   | 12                             | gliding       | 29                       | 10                      | 1                  | 147                      | 5.1                      | 12               | 4                   |
| BCY       | SP5BCY1     | 2774    | 126              | 4.5%                   | 12                             | gliding       | 31                       | 8                       | 1                  | 142                      | 5.1                      | 9                | 4                   |
| BCY       | GM202BCY1   | 2879    | 125              | 4.3%                   | 12                             | gliding       | 30                       | 11                      | 1                  | 134                      | 4.6                      | 9                | 3                   |
| GCR       | SP5GCR1     | 1474    | 91               | 6.2%                   | 0                              | none          | 13                       |                         | 8                  | 70                       | 4.6                      | 4                | 2                   |
| GCV       | GM7GCV1     | 1744    | 109              | 6.3%                   | 1                              | twitching     |                          | 2                       | 10                 | 123                      | 6.9                      | 5                | 3                   |
| OVB       | SP5OBV1     | 1744    | 66               | 3.8%                   | 0                              | twitching     |                          | 31                      | 13                 | 60                       | 3.9                      | 1                | 0                   |

**Supplementary Table 7.** Viral defense genes in assembled MAGs. Values were tallied based on keyword searches of MAG annotations at IMG-MER [7].

| tax group | MAG       | CRISPR loci (Minced) | integrated prophage recovered | IMG trans-posases | IMG restriction endo-nuclease | IMG DNA-modification methylase | toxin/anti-toxin genes |
|-----------|-----------|----------------------|-------------------------------|-------------------|-------------------------------|--------------------------------|------------------------|
| CHS       | SP12CHS1  | 5                    | 0                             | 60                | 7                             | 6                              | 81                     |
| CHS       | SP5CHS1   | 14                   | 0                             | 50                | 51                            | 16                             | 78                     |
| CHS       | GM102CHS1 | 8                    | 2                             | 117               | 67                            | 20                             | 67                     |
| CHS       | GM202CHS1 | 4                    | 1                             | 318               | 51                            | 11                             | 93                     |
| CHS       | GM7CHS1   | 5                    | 2                             | 226               | 113                           | 6                              | 91                     |
| CPC       | SP5CPC1   | 0                    | 0                             | 73                | 12                            | 8                              | 29                     |
| AMS       | GM202ARS2 | 5                    | 3                             | 38                | 6                             | 7                              | 10                     |
| AMS       | GM7ARS4   | 6                    | 0                             | 1                 | 4                             | 5                              | 1                      |
| ARS       | GM202ARS1 | 11                   | 0                             | 4                 | 6                             | 3                              | 3                      |
| ARS       | SP5ARS3   | 14                   | 0                             | 1                 | 7                             | 3                              | 2                      |
| ARS       | GM102ARS1 | 10                   | 1                             | 0                 | 1                             | 1                              | 1                      |
| ARB       | SP5ARB1   | 6                    | 0                             | 15                | 9                             | 0                              | 0                      |
| ARB       | SP12ARB1  | 12                   | 0                             | 11                | 4                             | 15                             | 3                      |
| ARB       | GM7ARB1   | 16                   | 0                             | 0                 | 5                             | 21                             | 7                      |
| ARB       | GM7ARB2   | 27                   | 0                             | 7                 | 5                             | 23                             | 4                      |
| AHP       | SP12AHP1  | 15                   | 0                             | 34                | 7                             | 7                              | 6                      |
| AHP       | SP5AHP2   | 13                   | 0                             | 66                | 117                           | 8                              | 7                      |
| BCY       | GM202BCY1 | 8                    | 0                             | 33                | 9                             | 24                             | 14                     |
| BCY       | SP5BCY1   | 5                    | 0                             | 20                | 9                             | 27                             | 16                     |
| BCY       | SP12BCY1  | 9                    | 0                             | 19                | 7                             | 30                             | 16                     |
| GCR       | SP5GCR1   | 11                   | 0                             | 9                 | 3                             | 7                              | 2                      |
| GCV       | GM7GCV1   | 14                   | 1                             | 6                 | 6                             | 21                             | 6                      |
| OVB       | SP5OBV1   | 24                   | 0                             | 28                | 4                             | 14                             | 1                      |



**Supplementary Table 8.** Biosynthetic gene clusters predicted by AntiSmash [16], supplemented with aromatic halogenases predicted by Pfam database model PF04820 [17].

| tax group | genome    | Type I PKS | NRPS | Type III PKS | terpene-phosphonate | terpene carotenoid | terpene other | bacteriocin (RiPP) | beta-lactone | PDBE | Aromatic halogenases (PF04820) | cyano-bactin (RiPP) | Lanthi-peptide | Lasso-peptide (RiPP) |
|-----------|-----------|------------|------|--------------|---------------------|--------------------|---------------|--------------------|--------------|------|--------------------------------|---------------------|----------------|----------------------|
| CHS       | SP12CHS1  | 1          | 1    |              |                     |                    | 1             | 1                  |              | 1    |                                | 1                   |                |                      |
| CHS       | SP5CHS1   |            | 2    |              |                     |                    |               | 1                  |              | 1    |                                | 1                   |                |                      |
| CHS       | GM102CHS1 | 1          |      |              |                     |                    | 1             | 1                  |              | 1    |                                |                     |                |                      |
| CHS       | GM7CHS1pb | 3          | 5    |              |                     |                    | 2             | 1                  |              |      | 1                              | 1                   | 1              |                      |
| CHS       | GM202CHS1 | 4          | 7    |              |                     |                    | 2             | 1                  |              | 1    | 1                              | 1                   |                |                      |
| CPC       | SP5CPC1   |            | 2    |              |                     |                    | 4             | 2                  |              |      | 1                              |                     |                | 1                    |
| AMS       | GM202ARS2 |            |      |              | 1                   |                    | 1             |                    |              |      |                                |                     |                |                      |
| AMS       | GM7ARS4   |            |      |              | 1                   |                    |               |                    |              |      |                                |                     |                |                      |
| ARS       | SP5ARS3   |            |      |              |                     |                    | 1             | 1                  |              |      |                                |                     |                |                      |
| ARS       | GM202ARS1 |            |      |              |                     |                    | 1             |                    |              |      |                                |                     |                |                      |
| ARS       | GM102ARS1 |            |      |              |                     |                    | 1             | 1                  |              |      |                                |                     |                |                      |
| ARB       | GM7ARB1   |            |      |              |                     | 1                  | 1             | 1                  |              |      |                                |                     |                |                      |
| ARB       | GM7ARB2   |            |      |              |                     | 1                  |               | 1                  |              |      |                                |                     |                |                      |
| ARB       | SP12ARB1  |            |      |              |                     | 1                  | 1             | 1                  |              |      | 1                              |                     |                |                      |
| ARB       | SP5ARB1   |            |      |              |                     | 1                  | 1             | 1                  |              |      | 1                              |                     |                |                      |
| AHP       | SP5AHP2   |            |      |              |                     | 1                  | 1             |                    |              |      | 11                             |                     |                |                      |
| AHP       | SP12AHP   |            |      |              |                     | 1                  | 1             |                    |              |      | 8                              |                     |                |                      |
| BCY       | SP12BCY1  |            |      | 1            |                     | 1                  | 1             |                    |              |      |                                |                     |                |                      |
| BCY       | GM202BCY1 |            |      | 1            |                     | 1                  | 1             |                    |              |      |                                |                     |                |                      |
| BCY       | SP5BCY1   |            |      | 1            |                     | 1                  | 1             |                    |              |      |                                |                     |                |                      |
| GCR       | SP5GCR1   |            |      |              |                     |                    |               | 2                  |              |      |                                |                     |                |                      |
| GCV       | GM7GCV1   |            |      |              |                     |                    |               | 1                  | 1            |      |                                |                     |                |                      |
| OVB       | SP5OVB1   |            |      |              |                     |                    |               |                    |              |      |                                |                     |                |                      |

## References

1. Segata, N., et al., *PhyloPhlAn is a new method for improved phylogenetic and taxonomic placement of microbes*. Nat Commun, 2013. **4**: p. 2304.
2. Rodriguez-R, L. and K. Konstantinidis, *The enveomics collection: a toolbox for specialized analyses of microbial genomes and metagenomes*. PeerJ Preprints, 2016. **4**: p. e1900v1.
3. Rodriguez-R, L.M., and Konstantinos T. Konstantinidis, *Bypassing Cultivation To Identify Bacterial Species*. Microbe, 2014. **9**(3): p. 111-8.
4. Yarza, P., et al., *Uniting the classification of cultured and uncultured bacteria and archaea using 16S rRNA gene sequences*. Nat Rev Microbiol, 2014. **12**(9): p. 635-45.
5. Nazir, R., et al., *The Ecological Role of Type Three Secretion Systems in the Interaction of Bacteria with Fungi in Soil and Related Habitats Is Diverse and Context-Dependent*. Front Microbiol, 2017. **8**: p. 38.
6. Dewoody, R.S., P.M. Merritt, and M.M. Marketon, *Regulation of the Yersinia type III secretion system: traffic control*. Front Cell Infect Microbiol, 2013. **3**: p. 4.
7. Chen, I.A., et al., *IMG/M: integrated genome and metagenome comparative data analysis system*. Nucleic Acids Res, 2017. **45**(D1): p. D507-D516.
8. Neubauer, P.R., et al., *A flavin-dependent halogenase from metagenomic analysis prefers bromination over chlorination*. PLoS One, 2018. **13**(5): p. e0196797.
9. Agarwal, V., et al., *Biosynthesis of polybrominated aromatic organic compounds by marine bacteria*. Nat Chem Biol, 2014. **10**(8): p. 640-7.
10. Thomas, T., et al., *Diversity, structure and convergent evolution of the global sponge microbiome*. Nat Commun, 2016. **7**: p. 11870.
11. Schorn, M.A., et al., *Comparative Genomics of Cyanobacterial Symbionts Reveals Distinct, Specialized Metabolism in Tropical Dysideidae Sponges*. MBio, 2019. **10**(3): p. e00821-19.
12. Ridley, C.P., D. John Faulkner, and M.G. Haygood, *Investigation of Oscillatoria spongelliae-dominated bacterial communities in four dictyoceratid sponges*. Appl Environ Microbiol, 2005. **71**(11): p. 7366-75.
13. Donia, M.S., et al., *Complex microbiome underlying secondary and primary metabolism in the tunicate-Prochloron symbiosis*. Proc Natl Acad Sci U S A, 2011. **108**(51): p. E1423-32.
14. Thiel, V., et al., *Spatial distribution of sponge-associated bacteria in the Mediterranean sponge Tethya aurantium*. FEMS Microbiol Ecol, 2007. **59**(1): p. 47-63.
15. Giles, E.C., et al., *Bacterial community profiles in low microbial abundance sponges*. FEMS Microbiol Ecol, 2013. **83**(1): p. 232-41.
16. Blin, K., et al., *antiSMASH 5.0: updates to the secondary metabolite genome mining pipeline*. Nucleic Acids Res, 2019. **47**(W1): p. W81-W87.
17. Finn, R.D., et al., *The Pfam protein families database: towards a more sustainable future*. Nucleic Acids Res, 2016. **44**(D1): p. D279-85.
